# Supplementary material
Source: publisher figshare collection journal article supplement (https://gsajournals.figshare.com/articles/dataset/_/8967986)
Supplement: Supplementary file 1 [file 1]

**Supplementary Materials for**

**The trithorax group factor ULTRAPETALA1 regulates**

**developmental as well as biotic and abiotic stress response genes in**

**Arabidopsis**

Ludmila Tyler, Mark J. Miller and Jennifer C. Fletcher

Correspondence to: [jfletcher@berkeley.edu](mailto:jfletcher@berkeley.edu)

**This PDF file contains:**

Table S1

Figures S1-S8

Supplemental Tables S2 through S8 are provided separately as Excel files.

**Table S1. Pearson correlation coefficients ( $R^2$ ) for each genotype at each stage sampled.**

| Vegetative   | <i>Ler</i> | <i>ult1-3</i> | <i>35S:ULT1</i> | <i>clf-2</i> |
|--------------|------------|---------------|-----------------|--------------|
| $R^2 =$      | 0.9702     | 0.9700        | N/A             | N/A          |
| Reproductive | <i>Ler</i> | <i>ult1-3</i> | <i>35S:ULT1</i> | <i>clf-2</i> |
| $R^2 =$      | 0.9905     | 0.9918        | 0.9917          | 0.9870       |

N/A, not applicable.

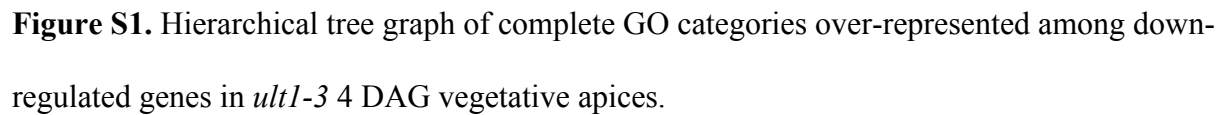

**Figure S1.** Hierarchical tree graph of complete GO categories over-represented among down-regulated genes in *ult1-3* 4 DAG vegetative apices.

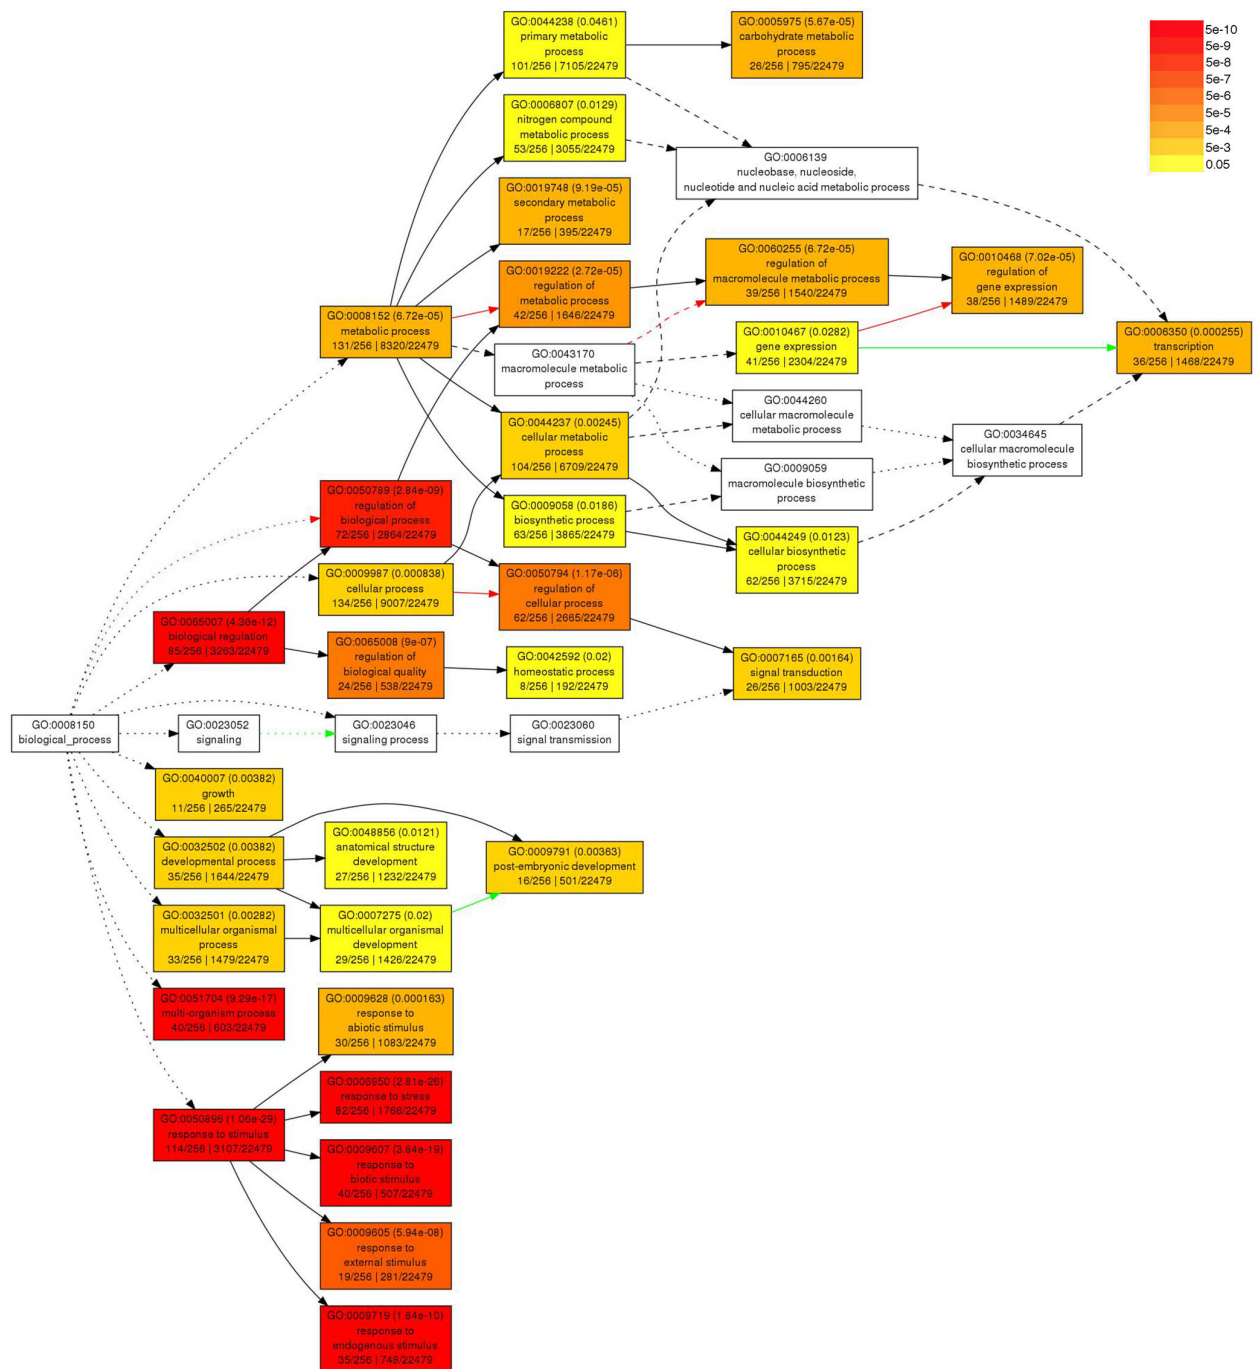

**Figure S2.** Hierarchical tree graph of GO slim categories over-represented among up-regulated genes in *ult1-3* 4 DAG vegetative apices.



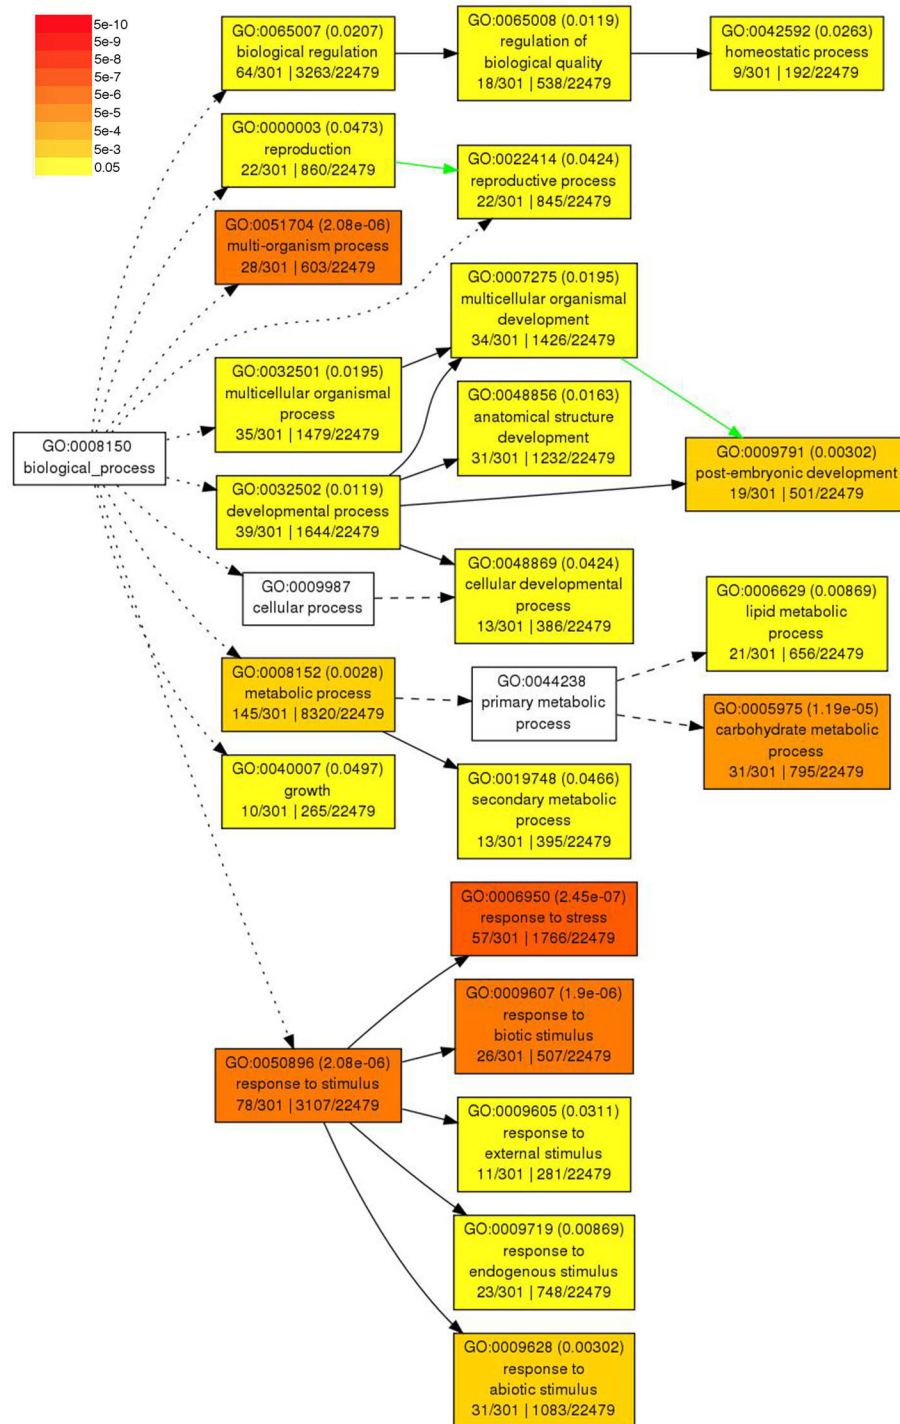

**Figure S4.** Hierarchical tree graph of GO slim categories over-represented among up-regulated genes in *ult1-3* inflorescence apices.





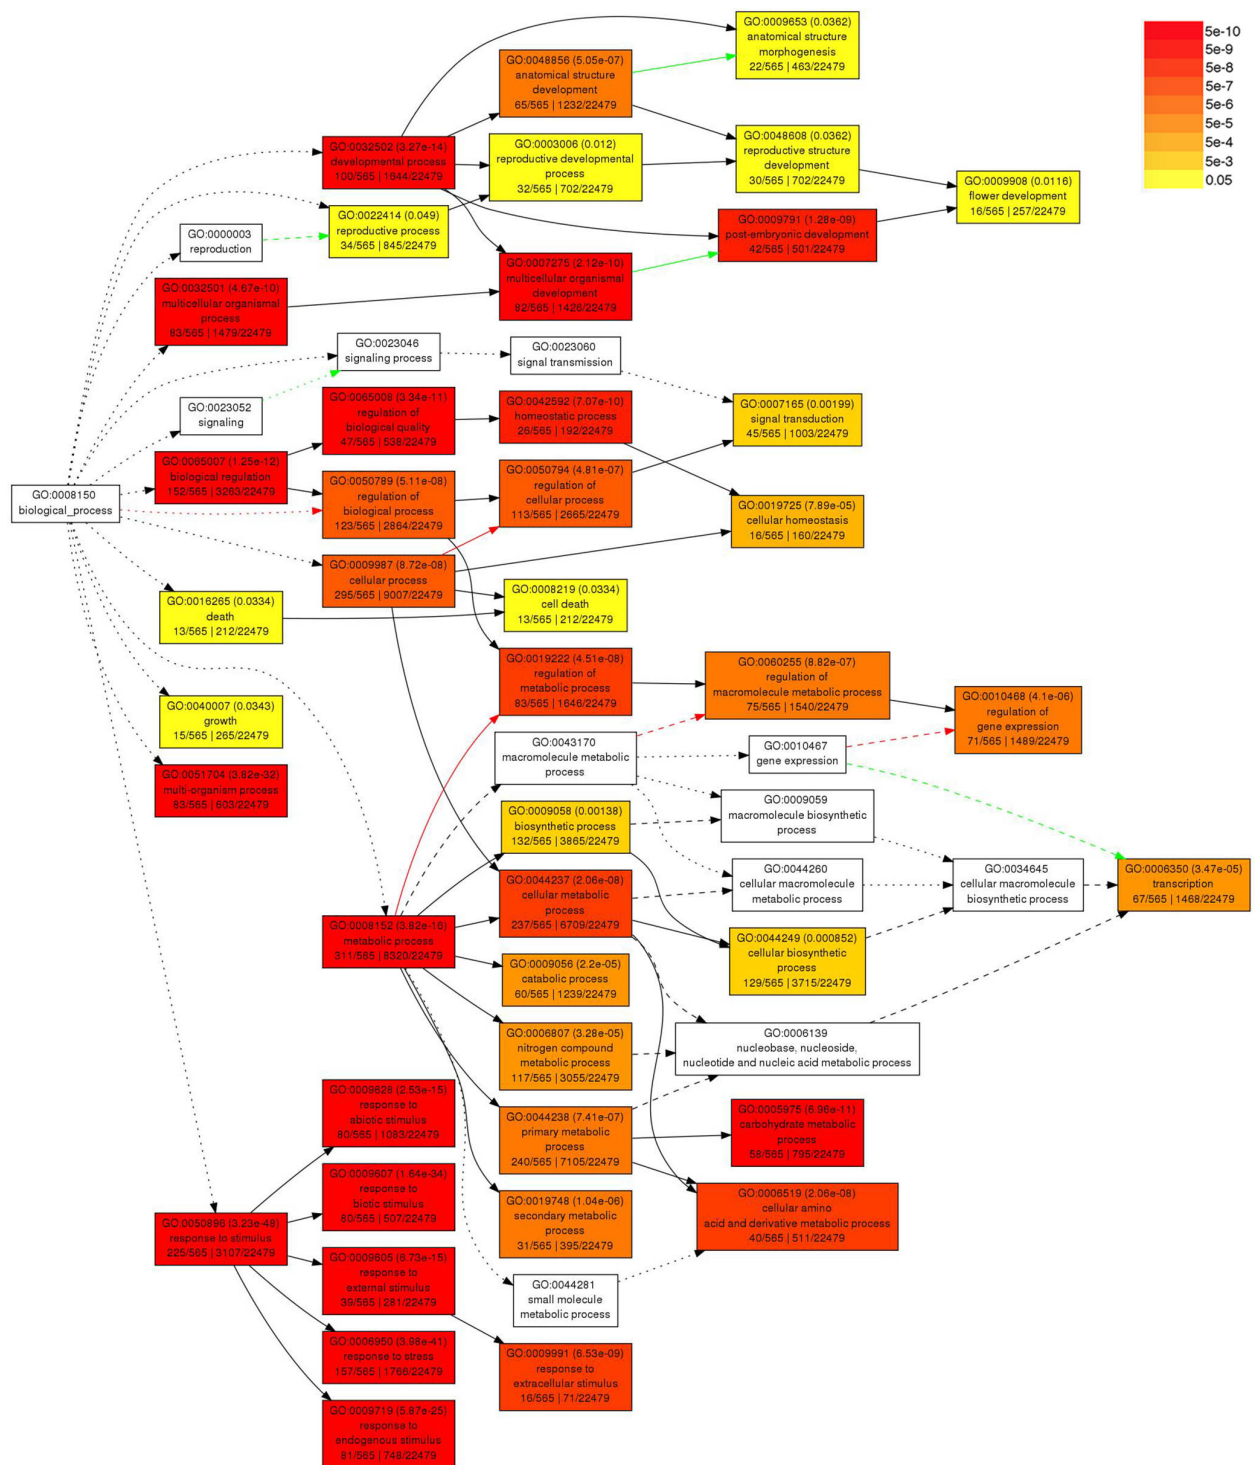

**Figure S6.** Hierarchical tree graph of GO slim categories over-represented among up-regulated genes in 35S:ULT1 inflorescence apices.



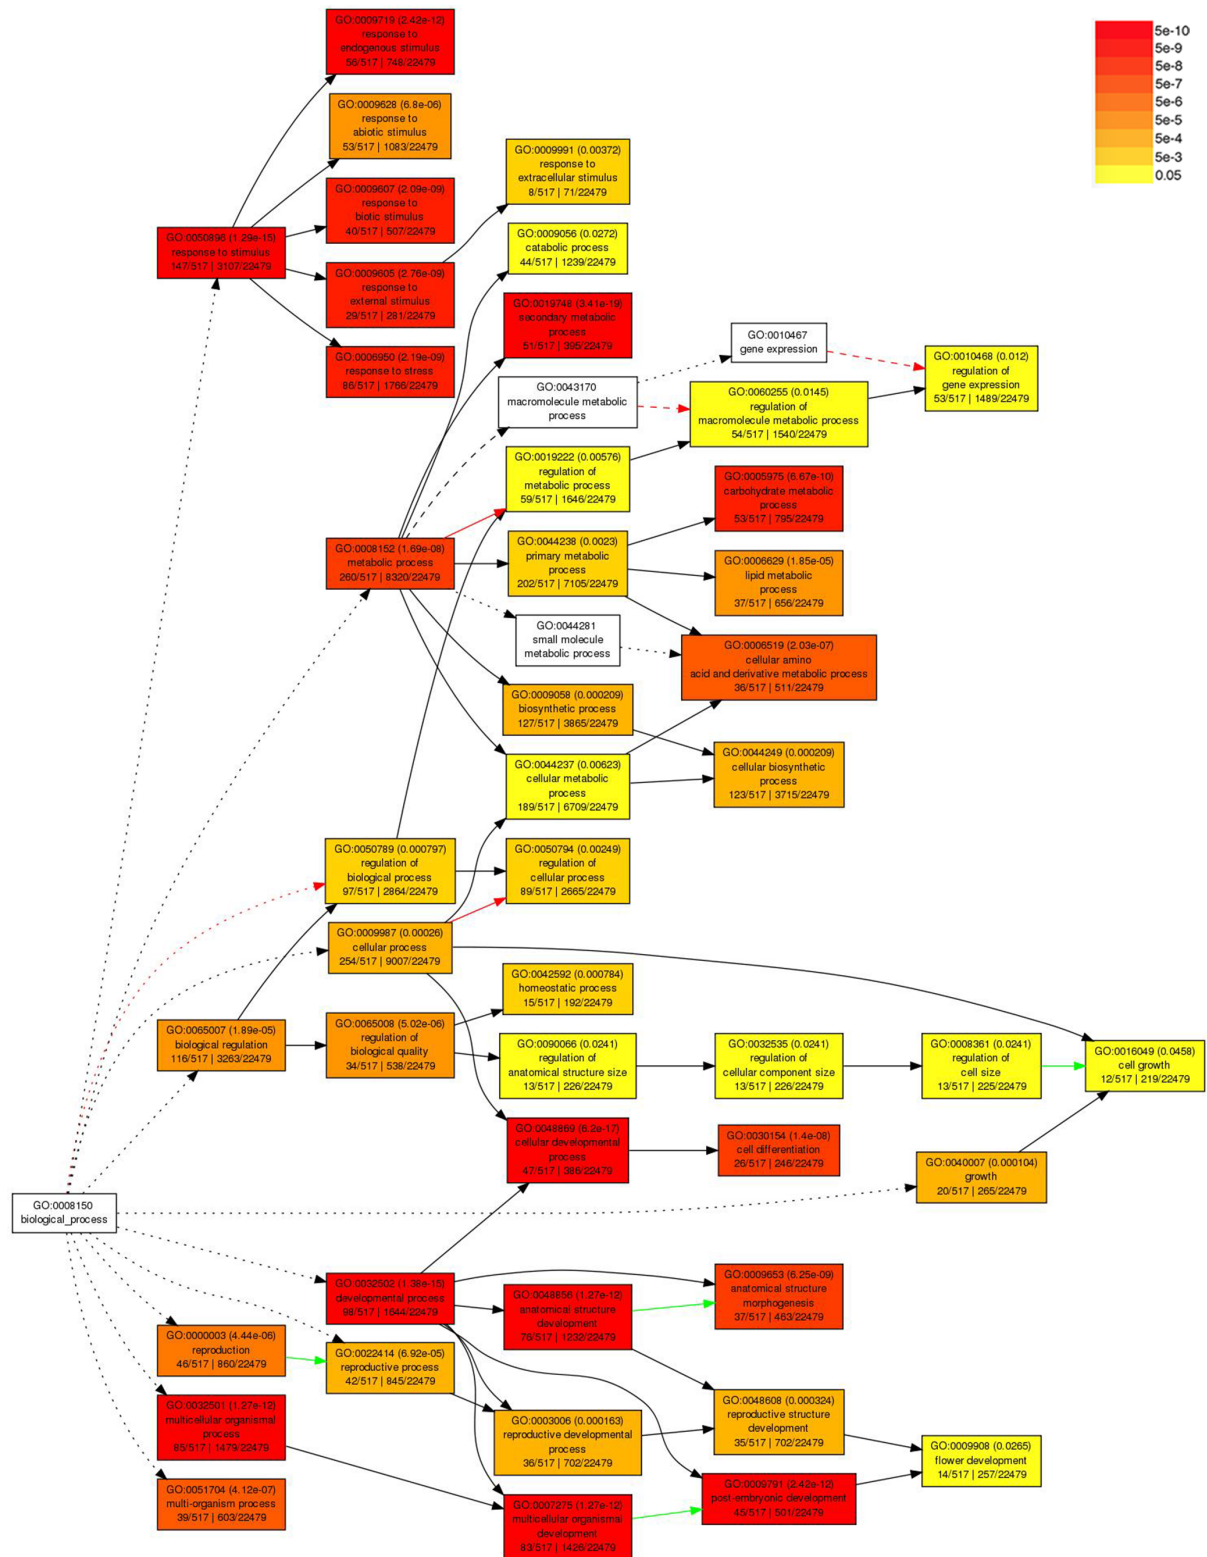

**Figure S7.** Hierarchical tree graph of GO slim categories over-represented among down-regulated genes in *clf-2* inflorescence apices.

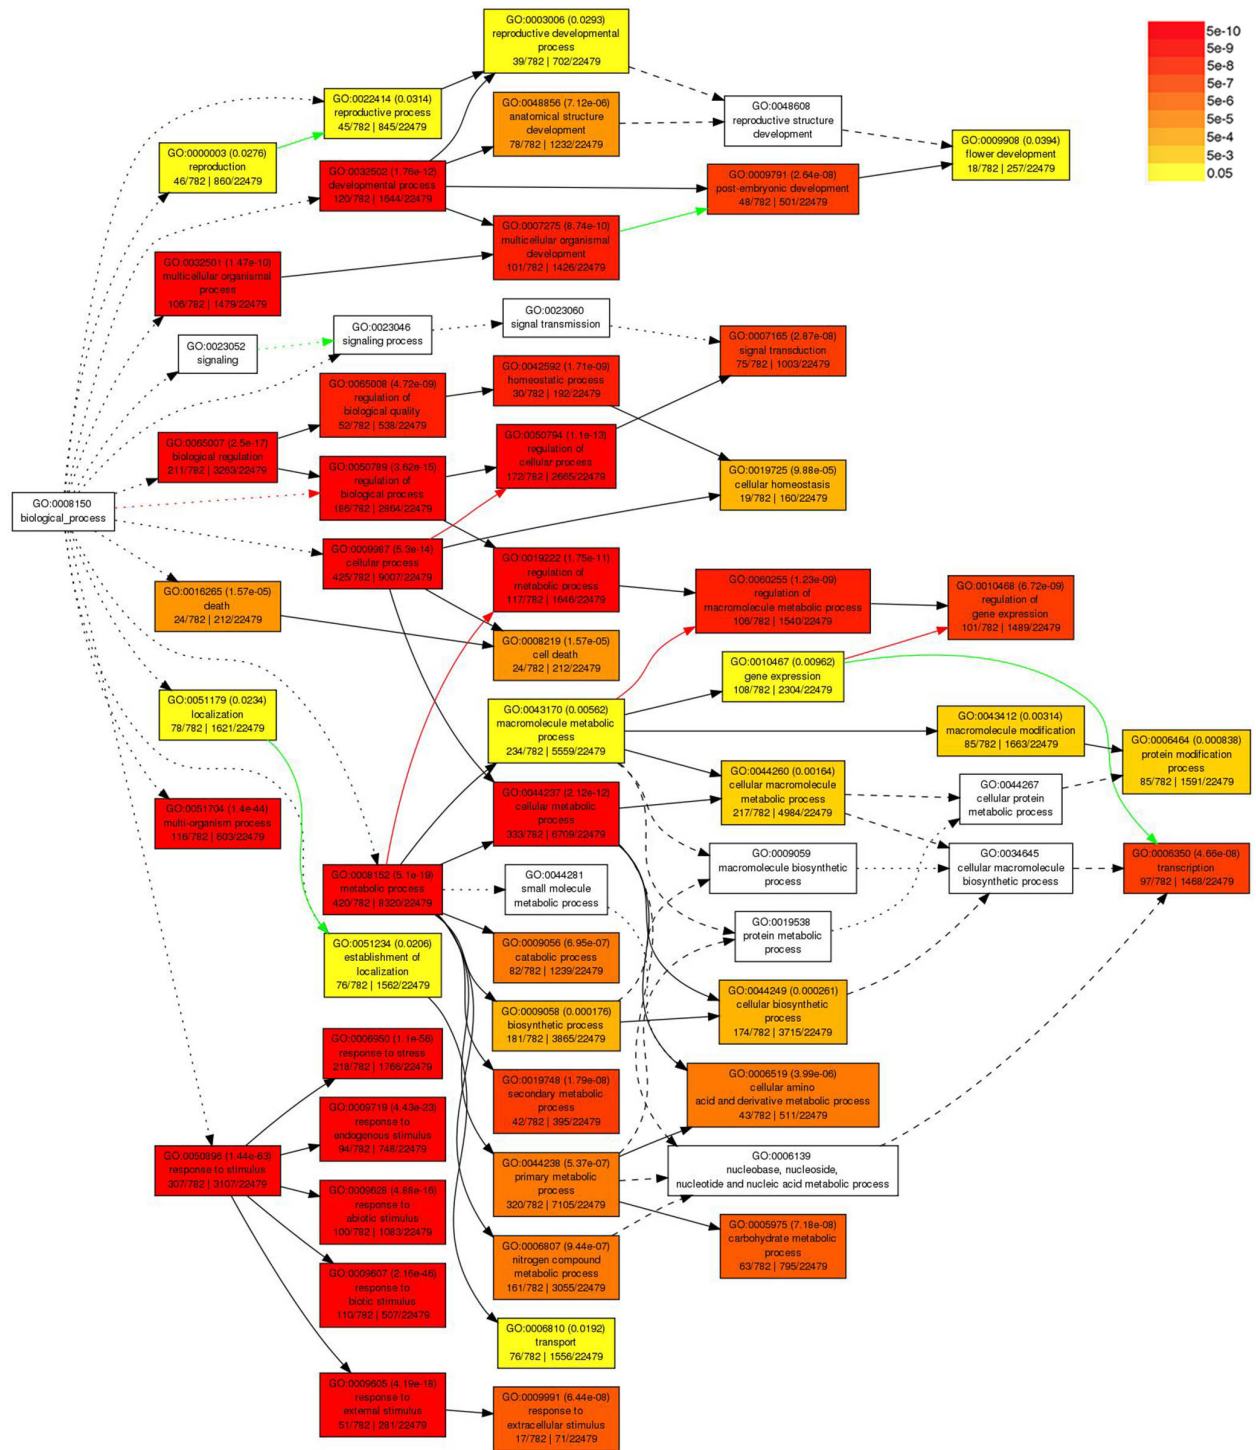

**Figure S8.** Hierarchical tree graph of GO slim categories over-represented among up-regulated genes in *clf-2* inflorescence apices.
